# Supplementary material for: Preliminary Characterisation of Metschnikowia pulcherrima to Be Used as a Starter Culture in Red Winemaking
Source: Preprints.org preprint supplement (doi:10.20944/preprints202408.0517.v1), 2024-08-07
Supplement: Supplementary file 1 [file supplementary]

|  | Yeast strains | Test A | Test B | Test C |
| --- | --- | --- | --- | --- |
|  | AS3C1 | 4.2 ± 0.1a | 4.2 ± 0.2a | 4.0 ± 0.1a |
| Alcohol (% v/v) | 14AS | 4.0 ± 0.1a | 3.8 ± 0.1a | 3.7 ± 0.1b |
| ASB3R | 4.8 ± 0.2a | 4.4 ± 0.1a | 4.0 ± 0.2b |
| *S. cerevisiae* F33 | 11.6 ± 0.2a | 11.4 ± 0.1a | 11.2 ± 0.1b |
| Volatile acidity  (g/L acetic acid) | AS3C1 | 0.16 ± 0.01a | 0.12 ± 0.01b | 0.12 ± 0.02b |
| 14AS | 0.16 ± 0.01a | 0.15 ± 0.02a | 0.12 ± 0.01b |
| ASB3R | 0.19 ± 0.01a | 0.15 ± 0.01b | 0.15 ± 0.02b |
| *S. cerevisiae* F33 | 0.46 ± 0.02a | 0.41 ± 0.01b | 0.42 ± 0.02b |
